# Supplementary material for: Outstanding Antibacterial Activity of Hypericum rochelii—Comparison of the Antimicrobial Effects of Extracts and Fractions from Four Hypericum Species Growing in Bulgaria with a Focus on Prenylated Phloroglucinols
Source: MDPI journal article supplement (doi:10.3390/life13020274), 2023-01-18
Supplement: s1 [file s1]

**Table S3.** One-way ANOVA of the metabolic activity of MRSA. Comparison between the treated groups and untreated control.

| Extract | Dunnett's multiple comparisons test | Significance |      | Adjusted P Value |
|---------|-------------------------------------|--------------|------|------------------|
| RochC   | Untreated control vs. 5000 *        | Yes          | **** | < 0,0001         |
|         | Untreated control vs. 2500          | Yes          | **** | < 0,0001         |
|         | Untreated control vs. 1250          | Yes          | **** | < 0,0001         |
|         | Untreated control vs. 625           | Yes          | **** | < 0,0001         |
|         | Untreated control vs. 313           | Yes          | **** | < 0,0001         |
|         | Untreated control vs. 156           | Yes          | **** | < 0,0001         |
|         | Untreated control vs. 78            | Yes          | **** | < 0,0001         |
|         | Untreated control vs. 39            | Yes          | **** | < 0,0001         |
|         | Untreated control vs. 19,5          | Yes          | **** | < 0,0001         |
|         | Untreated control vs. 9,8           | Yes          | **** | < 0,0001         |
| HirDM90 | Untreated control vs. 5000          | Yes          | **** | < 0,0001         |
|         | Untreated control vs. 2500          | Yes          | **** | < 0,0001         |
|         | Untreated control vs. 1250          | Yes          | **** | < 0,0001         |
|         | Untreated control vs. 625           | Yes          | **** | < 0,0001         |
|         | Untreated control vs. 313           | Yes          | **** | < 0,0001         |
|         | Untreated control vs. 156           | Yes          | **** | < 0,0001         |
|         | Untreated control vs. 78            | Yes          | **** | < 0,0001         |
|         | Untreated control vs. 39            | Yes          | **** | < 0,0001         |
|         | Untreated control vs. 19,5          | Yes          | **** | < 0,0001         |
|         | Untreated control vs. 9,8           | Yes          | *    | 0,0312           |
| RochD   | Untreated control vs. 5000          | Yes          | **** | < 0,0001         |
|         | Untreated control vs. 2500          | Yes          | **** | < 0,0001         |
|         | Untreated control vs. 1250          | Yes          | **** | < 0,0001         |
|         | Untreated control vs. 625           | Yes          | **** | < 0,0001         |
|         | Untreated control vs. 313           | Yes          | **** | < 0,0001         |
|         | Untreated control vs. 156           | Yes          | **** | < 0,0001         |
|         | Untreated control vs. 78            | Yes          | **** | < 0,0001         |
|         | Untreated control vs. 39            | Yes          | **** | < 0,0001         |
|         | Untreated control vs. 19,5          | Yes          | **** | < 0,0001         |
|         | Untreated control vs. 9,8           | Yes          | **** | < 0,0001         |
| RochCM  | Untreated control vs. 4,9           | Yes          | **** | < 0,0001         |
|         | Untreated control vs. 5000          | Yes          | **** | < 0,0001         |
|         | Untreated control vs. 2500          | Yes          | **** | < 0,0001         |
|         | Untreated control vs. 1250          | Yes          | **** | < 0,0001         |
|         | Untreated control vs. 625           | Yes          | **** | < 0,0001         |
|         | Untreated control vs. 313           | Yes          | **** | < 0,0001         |
|         | Untreated control vs. 156           | Yes          | **** | < 0,0001         |
|         | Untreated control vs. 78            | Yes          | **** | < 0,0001         |
|         | Untreated control vs. 39            | Yes          | **   | 0,0053           |
|         | Untreated control vs. 19,5          | No           | ns   | 0,7961           |
| BarbD   | Untreated control vs. 9,8           | No           | ns   | 0,2807           |
|         | Untreated control vs. 5000          | Yes          | **** | < 0,0001         |
|         | Untreated control vs. 2500          | Yes          | **** | < 0,0001         |
|         | Untreated control vs. 1250          | Yes          | **** | < 0,0001         |
|         | Untreated control vs. 625           | Yes          | **** | < 0,0001         |
|         | Untreated control vs. 313           | Yes          | *    | 0,0185           |
|         | Untreated control vs. 156           | Yes          | ***  | 0,0001           |
|         | Untreated control vs. 78            | Yes          | *    | 0,0108           |
|         | Untreated control vs. 39            | Yes          | **   | 0,0099           |
|         | Untreated control vs. 19,5          | Yes          | ***  | 0,0005           |
| RumDBe  | Untreated control vs. 9,8           | Yes          | *    | 0,0160           |
|         | Untreated control vs. 5000          | Yes          | ***  | 0,0002           |
|         | Untreated control vs. 2500          | Yes          | ***  | 0,0003           |
|         | Untreated control vs. 1250          | Yes          | **   | 0,0011           |
|         | Untreated control vs. 625           | Yes          | **   | 0,0070           |
|         | Untreated control vs. 313           | Yes          | *    | 0,0362           |
|         | Untreated control vs. 156           | No           | ns   | 0,0930           |

|        |                            |     |      |          |
|--------|----------------------------|-----|------|----------|
|        | Untreated control vs. 78   | No  | ns   | 0,9613   |
| RumDKo | Untreated control vs. 5000 | Yes | **** | < 0,0001 |
|        | Untreated control vs. 2500 | Yes | **** | < 0,0001 |
|        | Untreated control vs. 1250 | Yes | **** | < 0,0001 |
|        | Untreated control vs. 625  | Yes | **** | < 0,0001 |
|        | Untreated control vs. 313  | Yes | **** | < 0,0001 |
|        | Untreated control vs. 156  | Yes | **   | 0,0055   |

**Legend:** \* Concentrations of the extract in [mg/L]; ns – not significant.
