# Supplementary material for: Outstanding Antibacterial Activity of Hypericum rochelii—Comparison of the Antimicrobial Effects of Extracts and Fractions from Four Hypericum Species Growing in Bulgaria with a Focus on Prenylated Phloroglucinols
Source: MDPI journal article supplement (doi:10.3390/life13020274), 2023-01-18
Supplement: s1 [file s1]

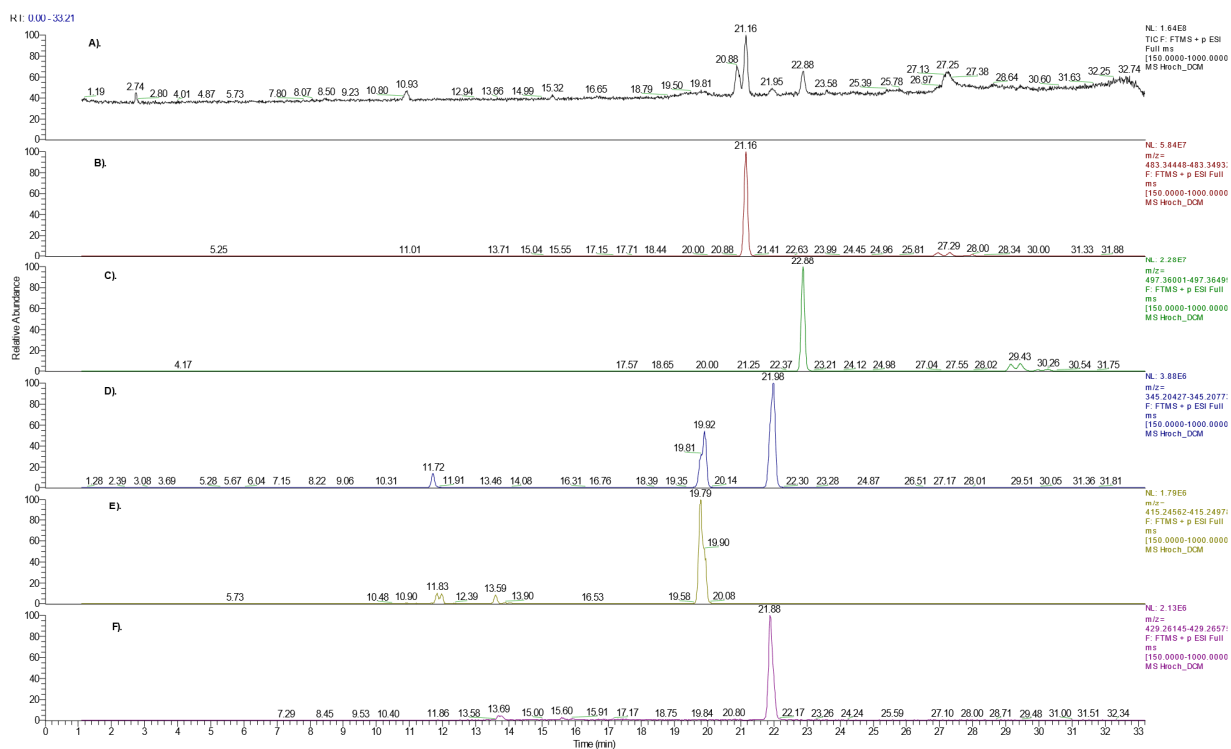

**Figure S1.** Chromatographic profile of RochD. A). Total Ion Chromatogram (TIC); B). eXtracted Ion Chromatogram (XIC) at  $m/z$  483.3469; C). XIC at  $m/z$  497.3625; D). XIC at  $m/z$  345.2060; E). XIC at  $m/z$  415.2477; F). XIC at  $m/z$  429.2636.

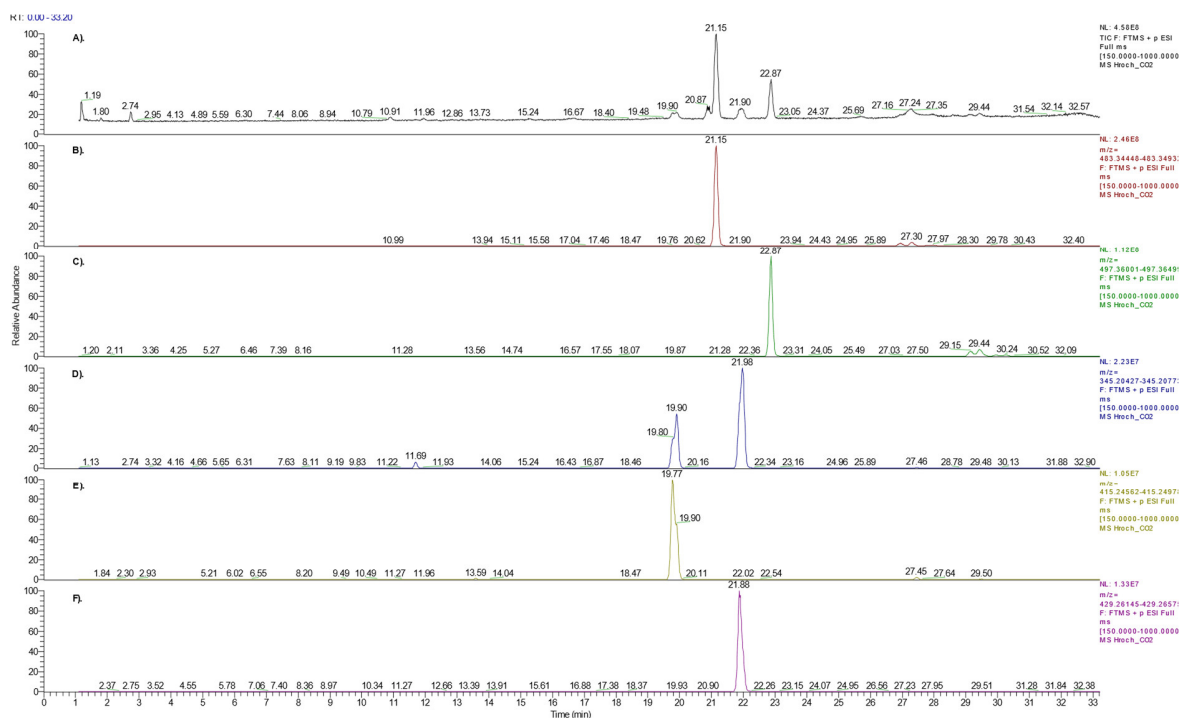

**Figure S2.** Chromatographic profile of RochC. A). TIC; B). XIC at  $m/z$  483.3469; C). XIC at  $m/z$  497.3625; D). XIC at  $m/z$  345.2060; E). XIC at  $m/z$  415.2477; F). XIC at  $m/z$  429.2636.

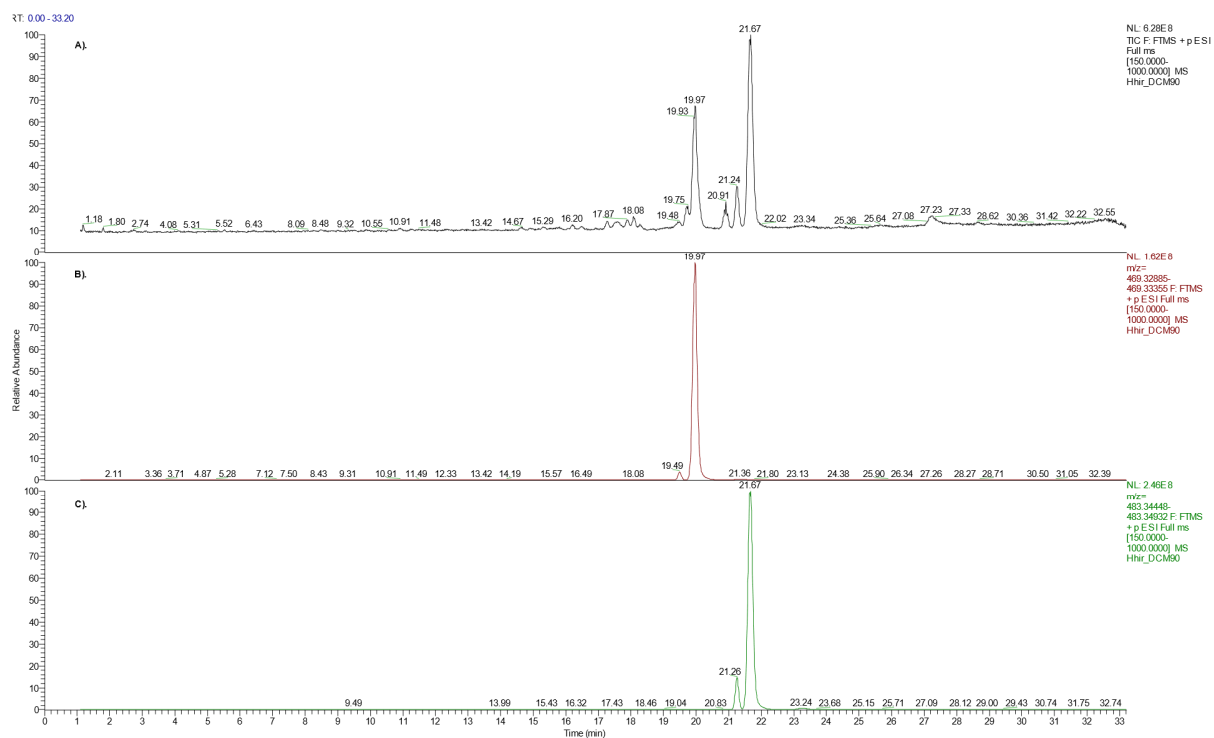

**Figure S3.** Chromatographic profile of HirDM90. A). TIC; B). XIC at  $m/z$  469.3312; C). XIC at  $m/z$  483.3469.
