# Supplementary material for: Outstanding Antibacterial Activity of Hypericum rochelii—Comparison of the Antimicrobial Effects of Extracts and Fractions from Four Hypericum Species Growing in Bulgaria with a Focus on Prenylated Phloroglucinols
Source: MDPI journal article supplement (doi:10.3390/life13020274), 2023-01-18
Supplement: s1 [file s1]

**Table S8.** One-way ANOVA of the metabolic activity of *Yersinia enterocolitica*. Comparison between the treated groups and untreated control.

| Extract | Dunnett's multiple comparisons test | Significance |    | Adjusted P Value |
|---------|-------------------------------------|--------------|----|------------------|
| RochC   | Untreated control vs. 5000 *        | Yes          | *  | 0,0147           |
|         | Untreated control vs. 2500          | Yes          | *  | 0,0497           |
| RochCM  | Untreated control vs. 5000          | No           | ns | 0,9998           |

**Legend:** \* Concentrations of the extract in [mg/L]; CI – confidence interval; ns – not significant.
