# Supplementary material for: Outstanding Antibacterial Activity of Hypericum rochelii—Comparison of the Antimicrobial Effects of Extracts and Fractions from Four Hypericum Species Growing in Bulgaria with a Focus on Prenylated Phloroglucinols
Source: MDPI journal article supplement (doi:10.3390/life13020274), 2023-01-18
Supplement: s1 [file s1]

**Table S1.** One-way ANOVA of the metabolic activity. Column statistics.

|          | Bacterial strains        |                   |         |          |          |         |         |          |         |         |         |          |         |         |         |        |
|----------|--------------------------|-------------------|---------|----------|----------|---------|---------|----------|---------|---------|---------|----------|---------|---------|---------|--------|
| Extracts | A. Staphylococcus aureus |                   |         |          |          |         |         |          |         |         |         |          |         |         |         |        |
| RochC    | Concentrations [mg/L]    | Untreated control | 1250    | 625      | 313      | 156     | 78      | 39       | 19,5    | 9,8     | 4,9     | 2,5      | 1,23    | 0,61    |         |        |
|          | Mean [%]                 | 100,0             | 0,0     | 2,844    | 0,0      | 0,0     | 0,0     | 0,0      | 0,0     | 0,0     | 2,369   | 2,811    | 1,807   | 73,00   |         |        |
|          | Std. deviation           | ±10,27            | ±1,027  | ±4,917   | ±1,541   | ±1,130  | ±1,315  | ±0,9607  | ±1,469  | ±1,593  | ±0,7382 | ±1,022   | ±0,8518 | ±1,136  |         |        |
| HirDM90  | Concentrations [mg/L]    | Untreated control | 5000    | ±        | 1250     | 625     | 313     | 156      | 78      | 39      | 19,5    | 9,8      | 4,9     | 2,5     | 1,23    | 0,61   |
|          | Mean [%]                 | 100,0             | 3,332   | 3,002    | 2,589    | 1,405   | 0,5784  | 0,3305   | 0,4957  | 0,3856  | 1,184   | 0,6059   | 0,8432  | 1,847   | 1,325   | 92,99  |
|          | Std. deviation           | ±6,232            | ±0,4284 | ±0,5063  | ±0,3895  | ±0,4284 | ±0,4284 | ±0,07790 | ±0,3895 | ±0,1558 | ±0,6621 | ±0,07790 | ±1,647  | ±0,4543 | ±0,6246 | ±9,199 |
| RochD    | Concentrations [mg/L]    | Untreated control | 5000    | 2500     | 1250     | 625     | 313     | 156      | 78      | 39      | 19,5    | 9,8      | 4,9     |         |         |        |
|          | Mean [%]                 | 100,0             | 0,0     | 0,0      | 0,0      | 0,0     | 0,0     | 4,046    | 3,463   | 2,171   | 1,984   | 1,692    | 1,047   |         |         |        |
|          | Std. deviation           | ±11,78            | ±3,829  | ±5,066   | ±1,649   | ±0,6480 | ±2,297  | ±0,1767  | ±0,1767 | ±0,1767 | ±0,3829 | ±0,8542  | ±0,3535 |         |         |        |
| RochCM   | Concentrations [mg/L]    | Untreated control | 5000    | 2500     | 1250     | 625     | 313     | 156      | 78      | 39      | 19,5    | 9,8      | 4,9     | 2,5     |         |        |
|          | Mean [%]                 | 100,0             | 0,0     | 0,0      | 0,0      | 0,0     | 0,0     | 0,0      | 0,0     | 0,0     | 0,0     | 0,0      | 0,9637  | 32,04   |         |        |
|          | Std. deviation           | ±10,27            | ±5,959  | ±3,288   | ±4,829   | ±6,370  | ±1,952  | ±4,418   | ±2,980  | ±1,130  | ±3,802  | ±5,651   | ±0,4543 | ±5,906  |         |        |
| BarbD    | Concentrations [mg/L]    | Untreated control | 5000    | 2500     | 1250     | 625     | 313     | 156      |         |         |         |          |         |         |         |        |
|          | Mean [%]                 | 100,0             | 0,0     | 0,0      | 0,0      | 33,90   | 48,31   | 81,62    |         |         |         |          |         |         |         |        |
|          | Std. deviation           | ±15,63            | ±0,4775 | ±1,117   | ±0,9323  | ±7,107  | ±2,770  | ±1,929   |         |         |         |          |         |         |         |        |
| HirDM100 | Concentrations [mg/L]    | Untreated control | 5000    | 2500     | 1250     | 625     | 313     | 156      | 78      | 39      | 19,5    | 9,8      |         |         |         |        |
|          | Mean [%]                 | 100,0             | 14,49   | 8,014    | 4,682    | 3,332   | 3,305   | 2,286    | 5,150   | 4,517   | 5,067   | 8,014    |         |         |         |        |
|          | Std. deviation           | ±6,232            | ±4,907  | ±1,597   | ±0,8569  | ±1,441  | ±2,571  | ±2,142   | ±5,648  | ±5,453  | ±5,686  | ±7,751   |         |         |         |        |
| RumDBe   | Concentrations [mg/L]    | Untreated control | 5000    | 2500     | 1250     | 625     |         |          |         |         |         |          |         |         |         |        |
|          | Mean [%]                 | 100,0             | 0,2623  | 0,0      | 0,0      | 32,69   |         |          |         |         |         |          |         |         |         |        |
|          | Std. deviation           | ±11,05            | ±1,271  | ±0,01658 | ±0,02763 | ±0,7183 |         |          |         |         |         |          |         |         |         |        |
| RumDKo   | Concentrations [mg/L]    | Untreated control | 5000    | 2500     | 1250     | 625     |         |          |         |         |         |          |         |         |         |        |
|          | Mean [%]                 | 100,0             | 1,838   | 10,10    | 82,74    | 100,0   |         |          |         |         |         |          |         |         |         |        |
|          | Std. deviation           | ±15,63            | ±0,7427 | ±7,051   | ±10,25   | ±15,63  |         |          |         |         |         |          |         |         |         |        |
| RochM    | Concentrations [mg/L]    | Untreated control | 5000    | 2500     | 1250     |         |         |          |         |         |         |          |         |         |         |        |
|          | Mean [%]                 | 100,0             | 7,554   | 12,07    | 79,20    |         |         |          |         |         |         |          |         |         |         |        |
|          | Std. deviation           | ±5,891            | ±5,596  | ±5,596   | ±5,596   |         |         |          |         |         |         |          |         |         |         |        |
| HirrD    | Concentrations           | Untreated         | 5000    |          |          |         |         |          |         |         |         |          |         |         |         |        |

|                                 |                |           |         |         |         |          |         |         |         |         |         |         |         |
|---------------------------------|----------------|-----------|---------|---------|---------|----------|---------|---------|---------|---------|---------|---------|---------|
|                                 | [mg/L]         | control   |         |         |         |          |         |         |         |         |         |         |         |
|                                 | Mean [%]       | 100,0     | 79,87   |         |         |          |         |         |         |         |         |         |         |
|                                 | Std. deviation | ±6,232    | ±7,244  |         |         |          |         |         |         |         |         |         |         |
| <b>B. MRSA</b>                  |                |           |         |         |         |          |         |         |         |         |         |         |         |
| <b>RochC</b>                    | Concentrations | Untreated | 5000    | 2500    | 1250    | 625      | 313     | 156     | 78      | 39      | 19,5    | 9,8     |         |
|                                 | [mg/L]         | control   |         |         |         |          |         |         |         |         |         |         |         |
|                                 | Mean [%]       | 100,0     | 1,451   | 1,451   | 1,451   | 1,451    | 1,451   | 1,451   | 1,451   | 1,451   | 1,451   | 1,451   |         |
|                                 | Std. deviation | ±1,845    | ±5,350  | ±8,486  | ±1,015  | ±3,321   | ±5,258  | ±7,656  | ±2,583  | ±9,132  | ±3,782  | ±7,103  |         |
| <b>HirDM90</b>                  | Concentrations | Untreated | 5000    | 2500    | 1250    | 625      | 313     | 156     | 78      | 39      | 19,5    | 9,8     |         |
|                                 | [mg/L]         | control   |         |         |         |          |         |         |         |         |         |         |         |
|                                 | Mean [%]       | 100,0     | 5,105   | 7,707   | 4,761   | 1,129    | 0,0     | 0,0     | 0,0     | 3,092   | 41,53   | 81,58   |         |
|                                 | Std. deviation | ±13,88    | ±1,666  | ±0,3471 | ±0,3471 | ±0,06942 | ±0,1388 | ±0,3471 | ±0,3471 | ±6,178  | ±2,221  | ±7,081  |         |
| <b>RochD</b>                    | Concentrations | Untreated | 5000    | 2500    | 1250    | 625      | 313     | 156     | 78      | 39      | 19,5    | 9,8     | 4,9     |
|                                 | [mg/L]         | control   |         |         |         |          |         |         |         |         |         |         |         |
|                                 | Mean [%]       | 100,0     | 0,0     | 0,0     | 0,0     | 0,0      | 0,0     | 4,046   | 3,463   | 2,171   | 1,984   | 1,692   | 1,047   |
|                                 | Std. deviation | ±11,78    | ±2,474  | ±1,655  | ±5,066  | ±0,8837  | ±1,944  | ±0,1767 | ±0,1767 | ±0,1767 | ±0,3829 | ±0,8542 | ±0,3535 |
| <b>RochCM</b>                   | Concentrations | Untreated | 5000    | 2500    | 1250    | 625      | 313     | 156     | 78      | 39      | 19,5    | 9,8     |         |
|                                 | [mg/L]         | control   |         |         |         |          |         |         |         |         |         |         |         |
|                                 | Mean [%]       | 100,0     | 5,267   | 5,267   | 5,267   | 5,267    | 5,267   | 5,267   | 30,12   | 69,87   | 92,28   | 86,41   |         |
|                                 | Std. deviation | ±1,845    | ±10,15  | ±8,486  | ±12,36  | ±1,845   | ±7,195  | ±0,6457 | ±6,549  | ±3,367  | ±1,660  | ±2,491  |         |
| <b>BarbD</b>                    | Concentrations | Untreated | 5000    | 2500    | 1250    | 625      | 313     | 156     | 78      |         |         |         |         |
|                                 | [mg/L]         | control   |         |         |         |          |         |         |         |         |         |         |         |
|                                 | Mean [%]       | 100,0     | 0,0     | 6,193   | 31,58   | 57,29    | 89,49   | 79,02   | 88,51   |         |         |         |         |
|                                 | Std. deviation | ±1,682    | ±0,4204 | ±1,934  | ±5,970  | ±0,4624  | ±0,5886 | ±1,934  | ±3,489  |         |         |         |         |
| <b>RumDBe</b>                   | Concentrations | Untreated | 5000    | 2500    | 1250    | 625      | 313     | 156     | 78      |         |         |         |         |
|                                 | [mg/L]         | control   |         |         |         |          |         |         |         |         |         |         |         |
|                                 | Mean [%]       | 100,0     | 0,0     | 0,6936  | 14,84   | 34,31    | 49,80   | 58,51   | 88,18   |         |         |         |         |
|                                 | Std. deviation | ±1,682    | ±0,4204 | ±1,135  | ±0,2102 | ±1,093   | ±3,405  | ±1,682  | ±1,598  |         |         |         |         |
| <b>RumDKo</b>                   | Concentrations | Untreated | 5000    | 2500    | 1250    | 625      | 313     | 156     |         |         |         |         |         |
|                                 | [mg/L]         | control   |         |         |         |          |         |         |         |         |         |         |         |
|                                 | Mean [%]       | 100,0     | 0,0     | 1,823   | 23,02   | 48,67    | 59,20   | 82,65   |         |         |         |         |         |
|                                 | Std. deviation | ±1,682    | ±1,682  | ±0,3784 | ±2,775  | ±2,817   | ±3,657  | ±8,576  |         |         |         |         |         |
| <b>C. Enterococcus faecalis</b> |                |           |         |         |         |          |         |         |         |         |         |         |         |
| <b>RochC</b>                    | Concentrations | Untreated | 1250    | 625     | 313     | 156      | 78      | 39      | 19,5    | 9,8     | 4,9     | 2,5     |         |
|                                 | [mg/L]         | control   |         |         |         |          |         |         |         |         |         |         |         |
|                                 | Mean [%]       | 100,0     | 26,25   | 17,28   | 8,415   | 3,670    | 0,7414  | 0,0     | 0,5561  | 0,7414  | 4,523   | 47,82   |         |
|                                 | Std. deviation | ±10,49    | ±3,408  | ±0,1573 | ±1,153  | ±0,6291  | ±0,7864 | ±0,7864 | ±0,8388 | ±0,6815 | ±1,625  | ±1,311  |         |
| <b>HirDM90</b>                  | Concentrations | Untreated | 5000    | 2500    | 1250    | 625      | 313     | 156     | 78,125  | 39,0625 | 19,5    | 9,8     |         |

|               |                |           |        |          |         |         |         |         |         |         |        |         |        |
|---------------|----------------|-----------|--------|----------|---------|---------|---------|---------|---------|---------|--------|---------|--------|
|               | [mg/L]         | control   |        |          |         |         |         |         |         |         |        |         |        |
|               | Mean [%]       | 100,0     | 9,210  | 11,44    | 8,032   | 5,675   | 2,977   | 2,202   | 1,861   | 5,055   | 41,18  | 70,80   |        |
|               | Std. deviation | ±8,771    | ±1,973 | ±0,04385 | ±0,1316 | ±0,1316 | ±0,4386 | ±0,1316 | ±0,4386 | ±0,4824 | ±7,192 | ±1,623  |        |
| <b>RochD</b>  | Concentrations | Untreated | 5000   | 2500     | 1250    | 625     | 313     | 156     | 78      | 39      | 19,5   | 9,8     | 4,9    |
|               | [mg/L]         | control   |        |          |         |         |         |         |         |         |        |         |        |
|               | Mean [%]       | 100,0     | 8,706  | 8,871    | 9,199   | 25,05   | 3,121   | 68,75   | 69,73   | 60,86   | 86,49  | 69,32   | 61,44  |
|               | Std. deviation | ±9,293    | ±1,859 | ±10,92   | ±2,672  | ±5,808  | ±1,742  | ±3,949  | ±10,45  | ±9,293  | ±1,859 | ±6,853  | ±4,530 |
| <b>RochCM</b> | Concentrations | Untreated | 5000   | 2500     | 1250    | 625     | 313     | 156     | 78      | 39      | 19,5   | 9,8     |        |
|               | [mg/L]         | control   |        |          |         |         |         |         |         |         |        |         |        |
|               | Mean [%]       | 100,0     | 1,779  | 1,779    | 1,779   | 1,779   | 1,779   | 1,779   | 14,16   | 58,50   | 54,38  | 45,38   |        |
|               | Std. deviation | ±10,49    | ±6,082 | ±1,258   | ±10,49  | ±3,670  | ±5,033  | ±10,07  | ±2,569  | ±0,7864 | ±4,404 | ±0,6815 |        |
| <b>RumDBe</b> | Concentrations | Untreated | 5000   |          |         |         |         |         |         |         |        |         |        |
|               | [mg/L]         | control   |        |          |         |         |         |         |         |         |        |         |        |
|               | Mean [%]       | 100,0     | 38,63  |          |         |         |         |         |         |         |        |         |        |
|               | Std. deviation | ±10,91    | ±13,53 |          |         |         |         |         |         |         |        |         |        |

**D. Streptococcus pyogenes**

|                 |                |           |         |        |         |         |         |          |         |         |         |         |  |
|-----------------|----------------|-----------|---------|--------|---------|---------|---------|----------|---------|---------|---------|---------|--|
| <b>RochC</b>    | Concentrations | Untreated | 5000    | 2500   | 1250    | 625     | 313     | 156      | 78      | 39      | 19,5    | 9,8     |  |
|                 | [mg/L]         | control   |         |        |         |         |         |          |         |         |         |         |  |
|                 | Mean [%]       | 100,0     | 0,0     | 1,380  | 1,380   | 1,380   | 1,380   | 1,380    | 0,0     | 0,0     | 0,0     | 0,0     |  |
|                 | Std. deviation | ±4,762    | ±4,762  | ±4,095 | ±12,19  | ±1,048  | ±5,047  | ±1,762   | ±1,286  | ±0,9047 | ±1,286  | ±0,6666 |  |
| <b>HirDM90</b>  | Concentrations | Untreated | 5000    | 2500   | 1250    | 625     | 313     | 156      | 78      | 39      | 19,5    | 9,8     |  |
|                 | [mg/L]         | control   |         |        |         |         |         |          |         |         |         |         |  |
|                 | Mean [%]       | 100,0     | 8,252   | 12,72  | 10,02   | 5,851   | 4,014   | 3,001    | 2,476   | 28,69   | 59,15   | 81,21   |  |
|                 | Std. deviation | ±5,305    | ±0,1061 | ±1,220 | ±0,6896 | ±0,1061 | ±3,554  | ±0,9548  | ±0,2122 | ±2,387  | ±0,7957 | ±0,9018 |  |
| <b>RochD</b>    | Concentrations | Untreated | 5000    | 2500   | 1250    | 625     | 313     | 156      | 78      | 39      | 19,5    | 9,8     |  |
|                 | [mg/L]         | control   |         |        |         |         |         |          |         |         |         |         |  |
|                 | Mean [%]       | 100,0     | -3,599  | -3,013 | -2,916  | -3,111  | -2,525  | 12,16    | 11,38   | 63,94   | 76,43   | 96,63   |  |
|                 | Std. deviation | ±13,80    | ±1,104  | ±1,104 | ±1,104  | ±1,104  | ±0,4141 | ±0,2070  | ±1,449  | ±5,797  | ±0,8281 | ±0,0    |  |
| <b>RochCM</b>   | Concentrations | Untreated | 5000    | 2500   | 1250    | 625     | 313     | 156      | 78      | 39      | 19,5    | 9,8     |  |
|                 | [mg/L]         | control   |         |        |         |         |         |          |         |         |         |         |  |
|                 | Mean [%]       | 100,0     | 6,902   | 6,902  | 6,902   | 6,902   | 6,902   | 9,798    | 18,82   | 34,88   | 51,68   | 66,43   |  |
|                 | Std. deviation | ±4,762    | ±8,285  | ±8,571 | ±3,333  | ±12,09  | ±0,9047 | ±0,04762 | ±0,4286 | ±2,762  | ±2,428  | ±2,905  |  |
| <b>BarbD</b>    | Concentrations | Untreated | 5000    | 2500   | 1250    | 625     | 313     | 156      |         |         |         |         |  |
|                 | [mg/L]         | control   |         |        |         |         |         |          |         |         |         |         |  |
|                 | Mean [%]       | 100,0     | 30,90   | 38,42  | 46,73   | 52,85   | 62,15   | 74,93    |         |         |         |         |  |
|                 | Std. deviation | ±3,658    | ±3,904  | ±2,558 | ±10,87  | ±4,964  | ±5,074  | ±1,245   |         |         |         |         |  |
| <b>HirDM100</b> | Concentrations | Untreated | 5000    | 2500   | 1250    |         |         |          |         |         |         |         |  |
|                 | [mg/L]         | control   |         |        |         |         |         |          |         |         |         |         |  |
|                 | Mean [%]       | 100,0     | 66,84   | 68,49  | 84,77   |         |         |          |         |         |         |         |  |

|                           |                       |                   |                   |         |         |        |        |        |        |        |         |
|---------------------------|-----------------------|-------------------|-------------------|---------|---------|--------|--------|--------|--------|--------|---------|
|                           | Std. deviation        | ±5,305            | ±7,214            | ±11,99  | ±0,2122 |        |        |        |        |        |         |
| RumDBe                    | Concentrations [mg/L] | Untreated control | 5000              | 2500    | 1250    | 625    | 313    | 156    |        |        |         |
|                           | Mean [%]              | 100,0             | 5,661             | 8,003   | 35,73   | 50,66  | 54,68  | 70,12  |        |        |         |
|                           | Std. deviation        | ±5,174            | ±2,483            | ±3,104  | ±2,483  | ±2,483 | ±8,071 | ±1,966 |        |        |         |
| RumDKo                    | Concentrations [mg/L] | Untreated control | 5000              | 2500    | 1250    | 625    | 313    | 156    | 78     | 39     |         |
|                           | Mean [%]              | 100,0             | 10,76             | 51,66   | 55,73   | 60,63  | 80,63  | 84,85  | 88,19  | 97,39  |         |
|                           | Std. deviation        | ±3,658            | ±4,810            | ±6,167  | ±4,756  | ±6,676 | ±8,589 | ±6,684 | ±9,040 | ±2,579 |         |
| E. Escherichia coli       |                       |                   |                   |         |         |        |        |        |        |        |         |
| RochC                     | Concentrations [mg/L] | Untreated control | Untreated control | 5000    | 2500    | 1250   | 625    | 313    | 156    | 78     | 39      |
|                           | Mean [%]              | 100,0             | 100,0             | 17,02   | 23,54   | 18,66  | 42,02  | 48,50  | 59,63  | 66,15  | 81,60   |
|                           | Std. deviation        | ±2,890            | ±2,890            | ±2,572  | ±2,312  | ±4,538 | ±3,873 | ±2,803 | ±3,988 | ±5,462 | ±0,4335 |
| HirDM90                   | Concentrations        | Untreated control | 5000              | 2500    | 1250    | 625    | 313    |        |        |        |         |
|                           | Mean [%]              | 100,0             | 6,199             | 11,13   | 27,00   | 73,91  | 81,61  |        |        |        |         |
|                           | Std. deviation        | ±3,211            | ±0,3532           | ±1,991  | ±5,138  | ±3,211 | ±3,211 |        |        |        |         |
| RochD                     | Concentrations [mg/L] | Untreated control | 5000              | 2500    | 1250    | 625    |        |        |        |        |         |
|                           | Mean [%]              | 100,0             | 20,32             | 36,44   | 73,17   | 92,48  |        |        |        |        |         |
|                           | Std. deviation        | ±2,907            | ±5,233            | ±2,791  | ±3,227  | ±4,651 |        |        |        |        |         |
| RochCM                    | Concentrations [mg/L] | Untreated control | 5000              | 2500    | 1250    | 625    | 313    | 156    | 78     | 39     |         |
|                           | Mean [%]              | 100,0             | 36,44             | 35,95   | 54,91   | 66,89  | 68,54  | 71,61  | 86,28  | 74,41  |         |
|                           | Std. deviation        | ±2,312            | ±0,08671          | ±1,012  | ±3,613  | ±1,416 | ±2,659 | ±5,202 | ±1,561 | ±1,243 |         |
| BarbD                     | Concentrations [mg/L] | Untreated control | 5000              | 2500    |         |        |        |        |        |        |         |
|                           | Mean [%]              | 100,0             | 76,35             | 79,01   |         |        |        |        |        |        |         |
|                           | Std. deviation        | ±3,232            | ±2,457            | ±4,441  |         |        |        |        |        |        |         |
| RumDBe                    | Concentrations [mg/L] | Untreated control | 5000              | 2500    |         |        |        |        |        |        |         |
|                           | Mean [%]              | 100,0             | 87,57             | 90,67   |         |        |        |        |        |        |         |
|                           | Std. deviation        | ±4,570            | ±1,371            | ±5,979  |         |        |        |        |        |        |         |
| RochM                     | Concentrations [mg/L] | Untreated control | 5000              | 2500    | 1250    |        |        |        |        |        |         |
|                           | Mean [%]              | 100,0             | 70,50             | 78,35   | 87,50   |        |        |        |        |        |         |
|                           | Std. deviation        | ±2,907            | ±1,948            | ±0,9012 | ±1,047  |        |        |        |        |        |         |
| F. Pseudomonas aeruginosa |                       |                   |                   |         |         |        |        |        |        |        |         |

|                            |                       |                   |         |         |         |         |         |        |        |        |        |
|----------------------------|-----------------------|-------------------|---------|---------|---------|---------|---------|--------|--------|--------|--------|
| RochC                      | Concentrations [mg/L] | Untreated control | 1250    | 625     | 313     | 156     | 78      | 39     |        |        |        |
|                            | Mean [%]              | 100,0             | 16,43   | 27,16   | 29,19   | 46,08   | 65,22   | 64,90  |        |        |        |
|                            | Std. deviation        | ±2,606            | ±2,411  | ±2,997  | ±3,258  | ±0,6842 | ±8,145  | ±11,34 |        |        |        |
| HirDM90                    | Concentrations [mg/L] | Untreated control | 5000    | 2500    |         |         |         |        |        |        |        |
|                            | Mean [%]              | 100,0             | 7,799   | 42,25   |         |         |         |        |        |        |        |
|                            | Std. deviation        | ±4,258            | ±0,8943 | ±14,86  |         |         |         |        |        |        |        |
| RochD                      | Concentrations [mg/L] | Untreated control | 5000    | 2500    | 1250    | 625     | 313     | 156    | 78     | 39     | 19     |
|                            | Mean [%]              | 100,0             | -3,019  | -2,002  | 4,400   | 27,38   | 49,25   | 81,81  | 65,72  | 64,11  | 83,93  |
|                            | Std. deviation        | ±2,998            | ±0,0    | ±0,4197 | ±2,038  | ±7,315  | ±3,358  | ±1,979 | ±8,724 | ±4,407 | ±1,739 |
| RochCM                     | Concentrations [mg/L] | Untreated control | 5000    | 2500    | 1250    | 625     | 313     |        |        |        |        |
|                            | Mean [%]              | 100,0             | 40,36   | 54,88   | 57,41   | 86,32   | 91,09   |        |        |        |        |
|                            | Std. deviation        | ±2,606            | ±8,178  | ±2,769  | ±1,727  | ±5,278  | ±0,2281 |        |        |        |        |
| BarbD                      | Concentrations [mg/L] | Untreated control | 5000    | 2500    | 1250    |         |         |        |        |        |        |
|                            | Mean [%]              | 100,0             | 44,95   | 58,43   | 60,75   |         |         |        |        |        |        |
|                            | Std. deviation        | ±3,531            | ±1,765  | ±7,132  | ±0,6708 |         |         |        |        |        |        |
| HirDD                      | Concentrations [mg/L] | Untreated control | 5000    |         |         |         |         |        |        |        |        |
|                            | Mean [%]              | 100,0             | 91,39   |         |         |         |         |        |        |        |        |
|                            | Std. deviation        | ±4,258            | ±0,4684 |         |         |         |         |        |        |        |        |
| G. Yersinia enterocolitica |                       |                   |         |         |         |         |         |        |        |        |        |
| RochC                      | Concentrations [mg/L] | Untreated control | 5000    | 2500    |         |         |         |        |        |        |        |
|                            | Mean [%]              | 100,0             | 43,22   | 60,36   |         |         |         |        |        |        |        |
|                            | Std. deviation        | ±5,103            | ±9,899  | ±15,87  |         |         |         |        |        |        |        |
| RochCM                     | Concentrations [mg/L] | Untreated control | 5000    |         |         |         |         |        |        |        |        |
|                            | Mean [%]              | 100,0             | 94,31   |         |         |         |         |        |        |        |        |
|                            | Std. deviation        | ±5,103            | ±6,837  |         |         |         |         |        |        |        |        |
