# Supplementary material for: Outstanding Antibacterial Activity of Hypericum rochelii—Comparison of the Antimicrobial Effects of Extracts and Fractions from Four Hypericum Species Growing in Bulgaria with a Focus on Prenylated Phloroglucinols
Source: MDPI journal article supplement (doi:10.3390/life13020274), 2023-01-18
Supplement: s1 [file s1]

**Table S4.** One-way ANOVA of the metabolic activity of *Enterococcus faecalis*. Comparison between the treated groups and untreated control.

| Extract | Dunnett's multiple comparisons test | Significance |      | Adjusted P Value |
|---------|-------------------------------------|--------------|------|------------------|
| RochC   | Untreated control vs. 1250 *        | Yes          | **** | < 0,0001         |
|         | Untreated control vs. 625           | Yes          | **** | < 0,0001         |
|         | Untreated control vs. 313           | Yes          | **** | < 0,0001         |
|         | Untreated control vs. 156           | Yes          | **** | < 0,0001         |
|         | Untreated control vs. 78            | Yes          | **** | < 0,0001         |
|         | Untreated control vs. 39            | Yes          | **** | < 0,0001         |
|         | Untreated control vs. 19,5          | Yes          | **** | < 0,0001         |
|         | Untreated control vs. 9,8           | Yes          | **** | < 0,0001         |
|         | Untreated control vs. 4,9           | Yes          | **** | < 0,0001         |
|         | Untreated control vs. 2,5           | Yes          | ***  | 0,0001           |
| HirDM90 | Untreated control vs. 5000          | Yes          | **** | < 0,0001         |
|         | Untreated control vs. 2500          | Yes          | **** | < 0,0001         |
|         | Untreated control vs. 1250          | Yes          | **** | < 0,0001         |
|         | Untreated control vs. 625           | Yes          | **** | < 0,0001         |
|         | Untreated control vs. 313           | Yes          | **** | < 0,0001         |
|         | Untreated control vs. 156           | Yes          | **** | < 0,0001         |
|         | Untreated control vs. 78            | Yes          | **** | < 0,0001         |
|         | Untreated control vs. 39            | Yes          | **** | < 0,0001         |
|         | Untreated control vs. 19,5          | Yes          | **** | < 0,0001         |
|         | Untreated control vs. 9,8           | Yes          | **** | < 0,0001         |
| RochD   | Untreated control vs. 5000          | Yes          | **** | < 0,0001         |
|         | Untreated control vs. 2500          | Yes          | **** | < 0,0001         |
|         | Untreated control vs. 1250          | Yes          | **** | < 0,0001         |
|         | Untreated control vs. 625           | Yes          | **** | < 0,0001         |
|         | Untreated control vs. 313           | Yes          | **** | < 0,0001         |
|         | Untreated control vs. 156           | Yes          | *    | 0,0458           |
|         | Untreated control vs. 78            | No           | ns   | 0,0544           |
|         | Untreated control vs. 39            | Yes          | *    | 0,0117           |
|         | Untreated control vs. 19,5          | No           | ns   | 0,6840           |
|         | Untreated control vs. 9,8           | No           | ns   | 0,0506           |
|         | Untreated control vs. 4,9           | Yes          | *    | 0,0129           |
| RochCM  | Untreated control vs. 5000          | Yes          | **** | < 0,0001         |
|         | Untreated control vs. 2500          | Yes          | **** | < 0,0001         |
|         | Untreated control vs. 1250          | Yes          | **** | < 0,0001         |
|         | Untreated control vs. 625           | Yes          | **** | < 0,0001         |
|         | Untreated control vs. 313           | Yes          | **** | < 0,0001         |
|         | Untreated control vs. 156           | Yes          | **** | < 0,0001         |
|         | Untreated control vs. 78            | Yes          | **** | < 0,0001         |
|         | Untreated control vs. 39            | Yes          | **   | 0,0048           |
|         | Untreated control vs. 19,5          | Yes          | **   | 0,0024           |
|         | Untreated control vs. 9,8           | Yes          | ***  | 0,0006           |
| RumDBe  | Untreated control vs. 5000          | Yes          | *    | 0,0391           |

**Legend:** \* Concentrations of the extract in [mg/L]; ns – not significant.
