# Supplementary material for: Outstanding Antibacterial Activity of Hypericum rochelii—Comparison of the Antimicrobial Effects of Extracts and Fractions from Four Hypericum Species Growing in Bulgaria with a Focus on Prenylated Phloroglucinols
Source: MDPI journal article supplement (doi:10.3390/life13020274), 2023-01-18
Supplement: s1 [file s1]

**Table S2.** One-way ANOVA of the metabolic activity of *Staphylococcus aureus*. Comparison between the treated groups and untreated control.

| Extract  | Dunnett's multiple comparisons test | Significance |      | Adjusted P Value |
|----------|-------------------------------------|--------------|------|------------------|
| RochC    | Untreated control vs. 1250*         | Yes          | **** | < 0,0001         |
|          | Untreated control vs. 625           | Yes          | **** | < 0,0001         |
|          | Untreated control vs. 313           | Yes          | **** | < 0,0001         |
|          | Untreated control vs. 156           | Yes          | **** | < 0,0001         |
|          | Untreated control vs. 78            | Yes          | **** | < 0,0001         |
|          | Untreated control vs. 39            | Yes          | **** | < 0,0001         |
|          | Untreated control vs. 19,5          | Yes          | **** | < 0,0001         |
|          | Untreated control vs. 9,8           | Yes          | **** | < 0,0001         |
|          | Untreated control vs. 4,9           | Yes          | **** | < 0,0001         |
|          | Untreated control vs. 2,5           | Yes          | **** | < 0,0001         |
|          | Untreated control vs. 1,23          | Yes          | **** | < 0,0001         |
| HirDM90  | Untreated control vs. 0,61          | Yes          | **   | 0,0045           |
|          | Untreated control vs. 5000          | Yes          | **** | < 0,0001         |
|          | Untreated control vs. 2500          | Yes          | **** | < 0,0001         |
|          | Untreated control vs. 1250          | Yes          | **** | < 0,0001         |
|          | Untreated control vs. 625           | Yes          | **** | < 0,0001         |
|          | Untreated control vs. 313           | Yes          | **** | < 0,0001         |
|          | Untreated control vs. 156           | Yes          | **** | < 0,0001         |
|          | Untreated control vs. 78,125        | Yes          | **** | < 0,0001         |
|          | Untreated control vs. 39,0625       | Yes          | **** | < 0,0001         |
|          | Untreated control vs. 19,5          | Yes          | **** | < 0,0001         |
|          | Untreated control vs. 9,8           | Yes          | **** | < 0,0001         |
|          | Untreated control vs. 4,9           | Yes          | *    | 0,0136           |
|          | Untreated control vs. 2,5           | Yes          | *    | 0,0142           |
|          | Untreated control vs. 1,23          | Yes          | *    | 0,0139           |
|          | Untreated control vs. 0,61          | No           | ns   | 0,9946           |
| RochD    | Untreated control vs. 5000          | Yes          | **** | < 0,0001         |
|          | Untreated control vs. 2500          | Yes          | **** | < 0,0001         |
|          | Untreated control vs. 1250          | Yes          | **** | < 0,0001         |
|          | Untreated control vs. 625           | Yes          | **** | < 0,0001         |
|          | Untreated control vs. 313           | Yes          | **** | < 0,0001         |
|          | Untreated control vs. 156           | Yes          | **** | < 0,0001         |
|          | Untreated control vs. 78            | Yes          | **** | < 0,0001         |
|          | Untreated control vs. 39            | Yes          | **** | < 0,0001         |
|          | Untreated control vs. 19,5          | Yes          | **** | < 0,0001         |
|          | Untreated control vs. 9,8           | Yes          | **** | < 0,0001         |
|          | Untreated control vs. 4,9           | Yes          | **** | < 0,0001         |
| RochCM   | Untreated control vs. 5000          | Yes          | **** | < 0,0001         |
|          | Untreated control vs. 2500          | Yes          | **** | < 0,0001         |
|          | Untreated control vs. 1250          | Yes          | **** | < 0,0001         |
|          | Untreated control vs. 625           | Yes          | **** | < 0,0001         |
|          | Untreated control vs. 313           | Yes          | **** | < 0,0001         |
|          | Untreated control vs. 156           | Yes          | **** | < 0,0001         |
|          | Untreated control vs. 78,125        | Yes          | **** | < 0,0001         |
|          | Untreated control vs. 39,0625       | Yes          | **** | < 0,0001         |
|          | Untreated control vs. 19,5          | Yes          | **** | < 0,0001         |
|          | Untreated control vs. 9,8           | Yes          | **** | < 0,0001         |
|          | Untreated control vs. 4,9           | Yes          | **   | 0,0061           |
| BarbD    | Untreated control vs. 2,5           | Yes          | *    | 0,0296           |
|          | Untreated control vs. 5000          | Yes          | **** | < 0,0001         |
|          | Untreated control vs. 2500          | Yes          | **** | < 0,0001         |
|          | Untreated control vs. 1250          | Yes          | **** | < 0,0001         |
|          | Untreated control vs. 625           | Yes          | **** | < 0,0001         |
|          | Untreated control vs. 313           | Yes          | **** | < 0,0001         |
| HirDM100 | Untreated control vs. 156           | No           | ns   | 0,0625           |
|          | Untreated control vs. 5000          | Yes          | **** | < 0,0001         |
|          | Untreated control vs. 2500          | Yes          | **** | < 0,0001         |

|        |                               |     |      |          |
|--------|-------------------------------|-----|------|----------|
|        | Untreated control vs. 1250    | Yes | **** | < 0,0001 |
|        | Untreated control vs. 625     | Yes | **** | < 0,0001 |
|        | Untreated control vs. 313     | Yes | **** | < 0,0001 |
|        | Untreated control vs. 156     | Yes | **** | < 0,0001 |
|        | Untreated control vs. 78,125  | Yes | **** | < 0,0001 |
|        | Untreated control vs. 39,0625 | Yes | **** | < 0,0001 |
|        | Untreated control vs. 19,5    | Yes | **** | < 0,0001 |
|        | Untreated control vs. 9,8     | Yes | **** | < 0,0001 |
| RumDBe | Untreated control vs. 5000    | Yes | **** | < 0,0001 |
|        | Untreated control vs. 2500    | Yes | **** | < 0,0001 |
|        | Untreated control vs. 1250    | Yes | **** | < 0,0001 |
|        | Untreated control vs. 625     | Yes | **** | < 0,0001 |
| RumDKo | Untreated control vs. 5000    | Yes | **** | < 0,0001 |
|        | Untreated control vs. 2500    | Yes | **** | < 0,0001 |
|        | Untreated control vs. 1250    | No  | ns   | 0,4843   |
| RochM  | Untreated control vs. 5000    | Yes | **** | < 0,0001 |
|        | Untreated control vs. 2500    | Yes | **** | < 0,0001 |
|        | Untreated control vs. 1250    | No  | ns   | 0,1325   |

**Legend:** \* Concentration unit of all extracts is [mg/L]; ns – not significant.
