# Supplementary material for: Outstanding Antibacterial Activity of Hypericum rochelii—Comparison of the Antimicrobial Effects of Extracts and Fractions from Four Hypericum Species Growing in Bulgaria with a Focus on Prenylated Phloroglucinols
Source: MDPI journal article supplement (doi:10.3390/life13020274), 2023-01-18
Supplement: s1 [file s1]

**Table S5.** One-way ANOVA of the metabolic activity of *Streptococcus pyogenes*. Comparison between the treated groups and untreated control.

| Extract  | Dunnett's multiple comparisons test | Significance |      | Adjusted P Value |
|----------|-------------------------------------|--------------|------|------------------|
| RochC    | Untreated control vs. 5000 *        | Yes          | **** | < 0,0001         |
|          | Untreated control vs. 2500          | Yes          | **** | < 0,0001         |
|          | Untreated control vs. 1250          | Yes          | **** | < 0,0001         |
|          | Untreated control vs. 625           | Yes          | **** | < 0,0001         |
|          | Untreated control vs. 313           | Yes          | **** | < 0,0001         |
|          | Untreated control vs. 156           | Yes          | **** | < 0,0001         |
|          | Untreated control vs. 78            | Yes          | **** | < 0,0001         |
|          | Untreated control vs. 39            | Yes          | **** | < 0,0001         |
|          | Untreated control vs. 19,5          | Yes          | **** | < 0,0001         |
|          | Untreated control vs. 9,8           | Yes          | **** | < 0,0001         |
|          | Untreated control vs. 5000          | Yes          | **** | < 0,0001         |
|          | Untreated control vs. 2500          | Yes          | **** | < 0,0001         |
|          | Untreated control vs. 1250          | Yes          | **** | < 0,0001         |
| HirDM90  | Untreated control vs. 5000          | Yes          | **** | < 0,0001         |
|          | Untreated control vs. 2500          | Yes          | **** | < 0,0001         |
|          | Untreated control vs. 1250          | Yes          | **** | < 0,0001         |
|          | Untreated control vs. 625           | Yes          | **** | < 0,0001         |
|          | Untreated control vs. 313           | Yes          | **** | < 0,0001         |
|          | Untreated control vs. 156           | Yes          | **** | < 0,0001         |
|          | Untreated control vs. 78            | Yes          | **** | < 0,0001         |
|          | Untreated control vs. 39            | Yes          | **** | < 0,0001         |
|          | Untreated control vs. 19,5          | Yes          | **** | < 0,0001         |
|          | Untreated control vs. 9,8           | Yes          | **** | < 0,0001         |
| RochD    | Untreated control vs. 5000          | Yes          | **** | < 0,0001         |
|          | Untreated control vs. 2500          | Yes          | **** | < 0,0001         |
|          | Untreated control vs. 1250          | Yes          | **** | < 0,0001         |
|          | Untreated control vs. 625           | Yes          | **** | < 0,0001         |
|          | Untreated control vs. 313           | Yes          | **** | < 0,0001         |
|          | Untreated control vs. 156           | Yes          | **** | < 0,0001         |
|          | Untreated control vs. 78            | Yes          | **** | < 0,0001         |
|          | Untreated control vs. 39            | Yes          | **** | < 0,0001         |
|          | Untreated control vs. 19,5          | Yes          | **   | 0,0012           |
|          | Untreated control vs. 9,8           | No           | ns   | 0,9769           |
| RochCM   | Untreated control vs. 5000          | Yes          | **** | < 0,0001         |
|          | Untreated control vs. 2500          | Yes          | **** | < 0,0001         |
|          | Untreated control vs. 1250          | Yes          | **** | < 0,0001         |
|          | Untreated control vs. 625           | Yes          | **** | < 0,0001         |
|          | Untreated control vs. 313           | Yes          | **** | < 0,0001         |
|          | Untreated control vs. 156           | Yes          | **** | < 0,0001         |
|          | Untreated control vs. 78            | Yes          | **** | < 0,0001         |
|          | Untreated control vs. 39            | Yes          | **** | < 0,0001         |
|          | Untreated control vs. 19,5          | Yes          | ***  | 0,0002           |
|          | Untreated control vs. 9,8           | Yes          | **   | 0,0030           |
| BarbD    | Untreated control vs. 5000          | Yes          | **** | < 0,0001         |
|          | Untreated control vs. 2500          | Yes          | **** | < 0,0001         |
|          | Untreated control vs. 1250          | Yes          | **** | < 0,0001         |
|          | Untreated control vs. 625           | Yes          | **** | < 0,0001         |
|          | Untreated control vs. 313           | Yes          | **** | < 0,0001         |
| HirDM100 | Untreated control vs. 5000          | Yes          | ***  | 0,0005           |
|          | Untreated control vs. 2500          | Yes          | ***  | 0,0008           |
|          | Untreated control vs. 1250          | No           | ns   | 0,0822           |
| RumDBe   | Untreated control vs. 5000          | Yes          | **** | < 0,0001         |
|          | Untreated control vs. 2500          | Yes          | **** | < 0,0001         |
|          | Untreated control vs. 1250          | Yes          | **** | < 0,0001         |
|          | Untreated control vs. 625           | Yes          | **** | < 0,0001         |
|          | Untreated control vs. 313           | Yes          | **** | < 0,0001         |

|        |                            |     |      |          |
|--------|----------------------------|-----|------|----------|
|        | Untreated control vs. 156  | Yes | ***  | 0,0001   |
|        | Untreated control vs. 5000 | Yes | **** | < 0,0001 |
|        | Untreated control vs. 2500 | Yes | **** | < 0,0001 |
|        | Untreated control vs. 1250 | Yes | **** | < 0,0001 |
| RumDKo | Untreated control vs. 625  | Yes | **** | < 0,0001 |
|        | Untreated control vs. 313  | Yes | *    | 0,0208   |
|        | Untreated control vs. 156  | No  | ns   | 0,0960   |
|        | Untreated control vs. 78   | No  | ns   | 0,2754   |
|        | Untreated control vs. 39   | No  | ns   | 0,9993   |

**Legend:** \* Concentrations of the extract in [mg/L]; ns – not significant.
