# Supplementary material for: Outstanding Antibacterial Activity of Hypericum rochelii—Comparison of the Antimicrobial Effects of Extracts and Fractions from Four Hypericum Species Growing in Bulgaria with a Focus on Prenylated Phloroglucinols
Source: MDPI journal article supplement (doi:10.3390/life13020274), 2023-01-18
Supplement: s1 [file s1]

**Table S9.** One-way ANOVA of the biofilm absorbance. Column statistics.

| <b>Extract</b>  | <b>RochD</b>      |          |          |          |          |
|-----------------|-------------------|----------|----------|----------|----------|
| Concentrations* | Untreated control | 0,625    | 1,25     | 2,5      |          |
| Mean            | 1,331             | 0,4280   | 0,2615   | 0,2525   |          |
| Std. Deviation  | 0,09899           | 0,03111  | 0,05586  | 0,01768  |          |
| <b>Extract</b>  | <b>HirDM90</b>    |          |          |          |          |
| Concentrations  | Untreated control | 2,06     | 4,125    | 8,25     | 16,5     |
| Mean            | 1,331             | 0,3410   | 0,3145   | 0,2555   | 0,2505   |
| Std. Deviation  | 0,09899           | 0,01273  | 0,007778 | 0,007778 | 0,09970  |
| <b>Extract</b>  | <b>HirDM100</b>   |          |          |          |          |
| Concentrations  | Untreated control | 9,53125  | 19,0625  | 38,125   |          |
| Mean            | 1,331             | 0,3230   | 0,3115   | 0,2875   |          |
| Std. Deviation  | 0,09899           | 0,05233  | 0,04313  | 0,06293  |          |
| <b>Extract</b>  | <b>RumDKo</b>     |          |          |          |          |
| Concentrations  | Untreated control | 312,5    | 625      | 1250     | 2500     |
| Mean            | 0,7115            | 0,6440   | 0,6140   | 0,1890   | 0,0700   |
| Std. Deviation  | 0,006364          | 0,002828 | 0,002828 | 0,04384  | 0,009899 |

**Legend:** \* Concentration unit is [mg/L].

**Table S10.** One-way ANOVA of the biofilm absorbance. Comparison between the treated groups and untreated control.

| <b>Extract</b> | <b>Dunnett's multiple comparisons test</b> | <b>Mean Difference</b> | <b>95% CI of difference</b> | <b>Significant?</b> | <b>Summary</b> | <b>Adjusted P Value</b> |
|----------------|--------------------------------------------|------------------------|-----------------------------|---------------------|----------------|-------------------------|
| RochD          | Untreated control vs. 0,625*               | 0,903                  | 0,618 to 1,19               | Yes                 | **             | 0,0019                  |
|                | Untreated control vs. 1,25                 | 1,07                   | 0,784 to 1,35               | Yes                 | **             | 0,0011                  |
|                | Untreated control vs. 2,5                  | 1,08                   | 0,793 to 1,36               | Yes                 | **             | 0,0011                  |
| HirDM90        | Untreated control vs. 2,06                 | 0,990                  | 0,777 to 1,20               | Yes                 | ***            | 0,0002                  |
|                | Untreated control vs. 4,125                | 1,02                   | 0,803 to 1,23               | Yes                 | ***            | 0,0002                  |
|                | Untreated control vs. 8,25                 | 1,08                   | 0,862 to 1,29               | Yes                 | ***            | 0,0001                  |
|                | Untreated control vs. 16,5                 | 1,08                   | 0,867 to 1,29               | Yes                 | ***            | 0,0001                  |
| HirDM100       | Untreated control vs. 9,53125              | 1,01                   | 0,904 to 1,11               | Yes                 | ****           | < 0,0001                |
|                | Untreated control vs. 19,0625              | 1,02                   | 0,915 to 1,12               | Yes                 | ****           | < 0,0001                |
|                | Untreated control vs. 38,125               | 1,04                   | 0,939 to 1,15               | Yes                 | ****           | < 0,0001                |
| RumDKo         | Untreated control vs. 312,5                | 0,0675                 | -0,0127 to 0,148            | No                  | ns             | 0,0847                  |
|                | Untreated control vs. 625                  | 0,0975                 | 0,0173 to 0,178             | Yes                 | *              | 0,0262                  |
|                | Untreated control vs. 1250                 | 0,523                  | 0,442 to 0,603              | Yes                 | ****           | < 0,0001                |
|                | Untreated control vs. 2500                 | 0,642                  | 0,561 to 0,722              | Yes                 | ****           | < 0,0001                |

**Legend:** \* Concentrations of the extract in [mg/L].
