# Supplementary material for: Outstanding Antibacterial Activity of Hypericum rochelii—Comparison of the Antimicrobial Effects of Extracts and Fractions from Four Hypericum Species Growing in Bulgaria with a Focus on Prenylated Phloroglucinols
Source: MDPI journal article supplement (doi:10.3390/life13020274), 2023-01-18
Supplement: s1 [file s1]

**Table S7.** One-way ANOVA of the metabolic activity of *Pseudomonas aeruginosa*. Comparison between the treated groups and untreated control.

| Extract | Dunnett's multiple comparisons test | Significance |      | Adjusted P Value |
|---------|-------------------------------------|--------------|------|------------------|
| RochC   | Untreated control vs. 5000 *        | Yes          | **** | < 0,0001         |
|         | Untreated control vs. 2500          | Yes          | **** | < 0,0001         |
|         | Untreated control vs. 1250          | Yes          | **** | < 0,0001         |
|         | Untreated control vs. 625           | Yes          | ***  | 0,0003           |
|         | Untreated control vs. 313           | Yes          | **   | 0,0060           |
|         | Untreated control vs. 156           | Yes          | **   | 0,0057           |
|         | Untreated control vs. 78            | Yes          | *    | 0,0479           |
|         | Untreated control vs. 39            | No           | ns   | 0,9996           |
| HirDM90 | Untreated control vs. 5000          | Yes          | ***  | 0,0003           |
|         | Untreated control vs. 2500          | Yes          | *    | 0,0109           |
| RochD   | Untreated control vs. 5000          | Yes          | **** | < 0,0001         |
|         | Untreated control vs. 2500          | Yes          | **** | < 0,0001         |
|         | Untreated control vs. 1250          | Yes          | **** | < 0,0001         |
|         | Untreated control vs. 625           | Yes          | **** | < 0,0001         |
|         | Untreated control vs. 313           | Yes          | **** | < 0,0001         |
|         | Untreated control vs. 156           | Yes          | *    | 0,0310           |
|         | Untreated control vs. 78            | Yes          | ***  | 0,0003           |
|         | Untreated control vs. 39            | Yes          | ***  | 0,0002           |
|         | Untreated control vs. 19,5          | No           | ns   | 0,0613           |
| RochCM  | Untreated control vs. 5000          | Yes          | **** | < 0,0001         |
|         | Untreated control vs. 2500          | Yes          | ***  | 0,0003           |
|         | Untreated control vs. 1250          | Yes          | ***  | 0,0005           |
|         | Untreated control vs. 625           | No           | ns   | 0,2078           |
|         | Untreated control vs. 313           | No           | ns   | 0,5679           |
|         | Untreated control vs. 156           | No           | ns   | 0,9994           |
|         | Untreated control vs. 78            | No           | ns   | 0,9995           |
|         | Untreated control vs. 39            | No           | ns   | 0,8420           |
| BarbD   | Untreated control vs. 5000          | Yes          | ***  | 0,0003           |
|         | Untreated control vs. 2500          | Yes          | **   | 0,0025           |
|         | Untreated control vs. 1250          | Yes          | **   | 0,0038           |
| HirDD   | Untreated control vs. 5000          | No           | ns   | 0,8013           |

**Legend:** \* Concentrations of the extract in [mg/L]; ns – not significant.
