# Supplementary material for: Outstanding Antibacterial Activity of Hypericum rochelii—Comparison of the Antimicrobial Effects of Extracts and Fractions from Four Hypericum Species Growing in Bulgaria with a Focus on Prenylated Phloroglucinols
Source: MDPI journal article supplement (doi:10.3390/life13020274), 2023-01-18
Supplement: s1 [file s1]

**Table S6.** One-way ANOVA of the metabolic activity of *Escherichia coli*. Comparison between the treated groups and untreated control.

| Extract | Dunnett's multiple comparisons test | Significance |      | Adjusted P Value |
|---------|-------------------------------------|--------------|------|------------------|
| RochC   | Untreated control vs. 5000 *        | Yes          | **** | < 0,0001         |
|         | Untreated control vs. 2500          | Yes          | **** | < 0,0001         |
|         | Untreated control vs. 1250          | Yes          | **** | < 0,0001         |
|         | Untreated control vs. 625           | Yes          | **** | < 0,0001         |
|         | Untreated control vs. 313           | Yes          | **** | < 0,0001         |
|         | Untreated control vs. 156           | Yes          | **** | < 0,0001         |
|         | Untreated control vs. 78            | Yes          | **** | < 0,0001         |
|         | Untreated control vs. 39            | Yes          | **** | < 0,0001         |
| HirDM90 | Untreated control vs. 5000          | Yes          | **** | < 0,0001         |
|         | Untreated control vs. 2500          | Yes          | **** | < 0,0001         |
|         | Untreated control vs. 1250          | Yes          | **** | < 0,0001         |
|         | Untreated control vs. 625           | Yes          | **** | < 0,0001         |
|         | Untreated control vs. 313           | Yes          | ***  | 0,0003           |
| RochD   | Untreated control vs. 5000          | Yes          | ***  | 0,0001           |
|         | Untreated control vs. 2500          | Yes          | ***  | 0,0003           |
|         | Untreated control vs. 1250          | Yes          | **   | 0,0073           |
|         | Untreated control vs. 625           | No           | ns   | 0,3216           |
|         | Untreated control vs. 313           | Yes          | ***  | 0,0001           |
| RochCM  | Untreated control vs. 5000          | Yes          | **** | < 0,0001         |
|         | Untreated control vs. 2500          | Yes          | **** | < 0,0001         |
|         | Untreated control vs. 1250          | Yes          | **** | < 0,0001         |
|         | Untreated control vs. 625           | Yes          | **** | < 0,0001         |
|         | Untreated control vs. 313           | Yes          | **** | < 0,0001         |
|         | Untreated control vs. 156           | Yes          | **** | < 0,0001         |
|         | Untreated control vs. 78            | Yes          | **   | 0,0051           |
|         | Untreated control vs. 39            | Yes          | **** | < 0,0001         |
| BarbD   | Untreated control vs. 5000          | Yes          | **   | 0,0042           |
|         | Untreated control vs. 2500          | Yes          | **   | 0,0065           |
| RumDBe  | Untreated control vs. 5000          | No           | ns   | 0,0528           |
|         | Untreated control vs. 2500          | No           | ns   | 0,0897           |
| RochM   | Untreated control vs. 5000          | Yes          | **   | 0,0015           |
|         | Untreated control vs. 2500          | Yes          | **   | 0,0037           |
|         | Untreated control vs. 1250          | Yes          | *    | 0,0178           |

**Legend:** \* Concentrations of the extract in [mg/L]; ns – not significant.
