# Supplementary material for: Outstanding Antibacterial Activity of Hypericum rochelii—Comparison of the Antimicrobial Effects of Extracts and Fractions from Four Hypericum Species Growing in Bulgaria with a Focus on Prenylated Phloroglucinols
Source: Life (Basel). 2023 Jan 18;13(2):274. doi: 10.3390/life13020274 (PMC9959064; doi:10.3390/life13020274)
Supplement: Supplementary file 1 [file life-13-00274-s001.zip]

Archive with 10 entries (10 files):
- life-1975708-supplementary/Suppl. Table S2 DEHA S. aureus statistics.pdf
- life-1975708-supplementary/Suppl. Table S3 DEHA MRSA statistics.pdf
- life-1975708-supplementary/Suppl. Table S4 DEHA E. facalis statistics.pdf
- life-1975708-supplementary/Suppl. Table S5 DEHA S. pyogenes statistics.pdf
- life-1975708-supplementary/Suppl. Table S6 DEHA E. coli statistics.pdf
- life-1975708-supplementary/Suppl. Table S7 DEHA P. aeruginosa statistics.pdf
- life-1975708-supplementary/Suppl. Table S8 DEHA Y. enterocolitica statistics.pdf
- life-1975708-supplementary/Suppl. Tables S9,10 Biofilm absorbance ANOVA.pdf
- life-1975708-supplementary/Supplementary figures S1-3.pdf
- life-1975708-supplementary/Table S1 Means STDEV Metab. Activity.pdf
